# Supplementary material
Source: PubMed Central journal article supplement (PMC7112824)

Figure S1

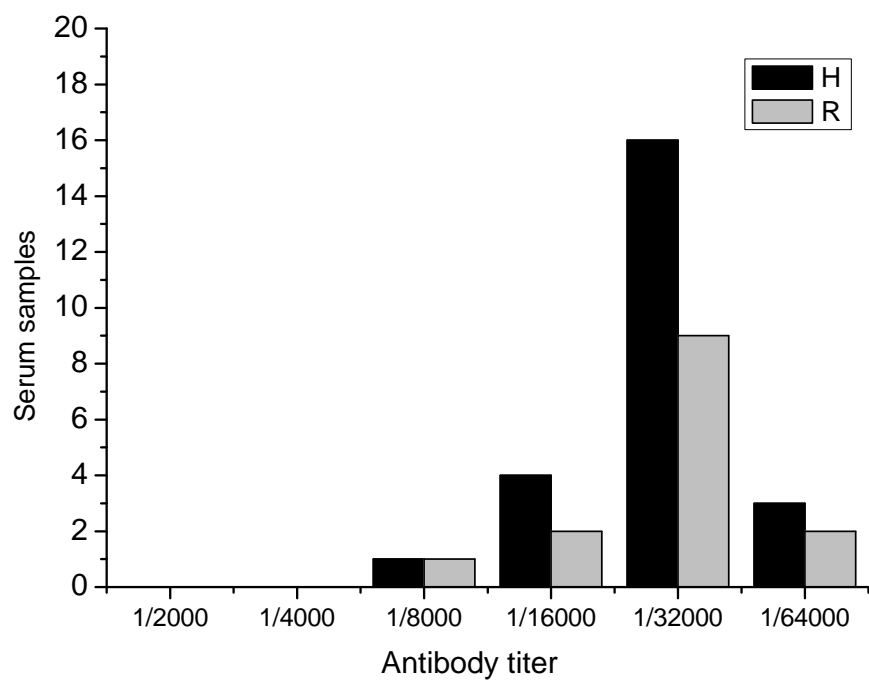

Supplement: mmc1.pdf [file mmc1.pdf]
